# Supplementary material for: Retrograde interferon‐gamma signaling induces major histocompatibility class I expression in human‐induced pluripotent stem cell‐derived neurons
Source: PubMed Central journal article supplement — Ann Clin Transl Neurol. 2017 Dec 21;5(2):172–85. doi: 10.1002/acn3.516 (PMC5817842; doi:10.1002/acn3.516), 2017-12-21
Supplement: ACN3-5-172-s001.pdf [file ACN3-5-172-s001.pdf]

## Supplementary Materials

### Supplemental Table I

| Gene Symbol | Forward                     | Reverse                  |
|-------------|-----------------------------|--------------------------|
| POU5F1      | ACCCACACTGCAGCAGATCA        | CACACTCGGACCACATCCTTCT   |
| SOX1        | ATACTGGAGACGAACGCCG         | AACCCAAGTCTGGTGTGTCAGC   |
| NES         | CTAGAGGAGGCAGGTGGTCT        | CAAGGTGAAGGGGCATCACT     |
| PAX6        | GCATTTGCATGTTGCGGAGT        | CGAAGCCTGACCTCTGTCAT     |
| MAP2        | GGGCCTTTTCTTTGAAATCTAGTTT   | CAAATGTGGCTCTCTGAAGAACA  |
| NEUN        | TCAAGGCTGTTGGAGTCGAG        | TCAAGCTGGTAGTGGGAGGT     |
| OLIG2       | TCGCATCCAGATTTTCGGGT        | AAAAGGTCATCGGGCTCTGG     |
| GALC        | CACACAATGGCTGAGTGGCTA       | AACGATAGGGCTCTGGGTAAT    |
| MBP         | ACTATCTCTTCCCTCCCAGCTTAAAAA | TCCGACTATAAATCGGCTCACA   |
| GLAST       | TACAATCAGGGATCGCCTCC        | TCGTGACAAGTGCTCCACAA     |
| GLT1        | GCAGTGTGTGGAGGGCTTCT        | CCTGGGAAGGCTATTAACATAACC |
| VGAT        | GACCAAGGAGGTCATCACGG        | CTCGACAGCGGCAAAGAATG     |
| GAPDH       | ATGTTTCGTCATGGGTGTGAA       | TGTGGTCATGAGTCCTTCCA     |
| HLA A       | TCGCTGTTCTAAAGTCCGCA        | GCTCGGTCAGTCTGTGAGTG     |
| HLA-B       | CTAGCAGTTGTGGTCATCGG        | CAAAGGGGAGGCGTGAAGAA     |
| HLA C       | GGTTGTCCTAGCTGTCCTTGG       | TGCTAACAGGAACGCAGACA     |
| B2M         | AAGCAGCATCATGGAGGTTTG       | GAGCTACCTGTGGAGCAACC     |
| TAP1        | GAGAAAATTGGGCACCAGGG        | GTGGCCTGCCCAGACTATTT     |
| TAP2        | CTGTGCTGTTCTCCGGTTCT        | TGTGAGCAATCACCAGCACT     |
| PSMB8       | AACCTCAGAACAGTAGGCCG        | CCTCCAGGTTCAACGGTCTC     |
| PSMB9       | TGGGTTCTGATTCCCGAGTG        | CCTGACCTCCTTCACGTTGG     |
| NLRC5       | GGCGGCTTCTACTTTCAGTTTC      | GTTCAGGGTCCAAGGTCTCG     |
| NRTN        | GGCAGGCGTTCAAAGTCAA         | GCCCTCTCGACACATCCAG      |
| PACRG       | GGTCTCGATGGGTCTGAAC         | TCTTCGGCATCTTGTCTGGG     |
| VGLU1       | GAGCGCGAAACTCATGAACC        | ACCTTGCTGATCTCGAAGCC     |

**Supplemental Table II**

| <b>Antigen</b>   | <b>Species</b> | <b>Catalog</b> | <b>Company</b> | <b>Clone</b> |
|------------------|----------------|----------------|----------------|--------------|
| <b>Nestin</b>    | Mouse          | MAB5326        | EMD Millipore  | 10C2         |
| <b>Sox2</b>      | Goat           | sc-17320       | Santa Cruz     | Y-17         |
| <b>MAG</b>       | Mouse          | MAB1567        | EMD Millipore  | 513          |
| <b>GFAP</b>      | Mouse          | MAB360         | EMD Millipore  | GA5          |
| <b>NeuN</b>      | Mouse          | MAB377         | EMD Millipore  | A60          |
| <b>NFL</b>       | Mouse          | MAB1615        | EMD Millipore  | DA2          |
| <b>MBP</b>       | Rat            | MAB386         | EMD Millipore  | 12           |
| <b>PLP</b>       | Mouse          | MAB388         | EMD Millipore  | PLPC1        |
| <b>HLA-A,B,C</b> | Mouse          | 311402         | Biologend      | W6/32        |
